# Supplementary material for: Evolution and genomic organization of muscle microRNAs in fish genomes
Source: PubMed Central journal article supplement (PMC4177693; doi:10.1186/s12862-014-0196-x), 2014-09-25

## EVOLUTION AND GENOMIC ORGANIZATION OF MUSCLE MICRORNAS IN FISH GENOMES

**Additional file 1:** Multiple alignments of precursor sequences of the muscle-enriched miRNAs between vertebrate species and the secondary structure of consensus sequence. Light gray bar indicates mature sequence; Black gray bar indicates seed sequence.

### Alignment of miR-1

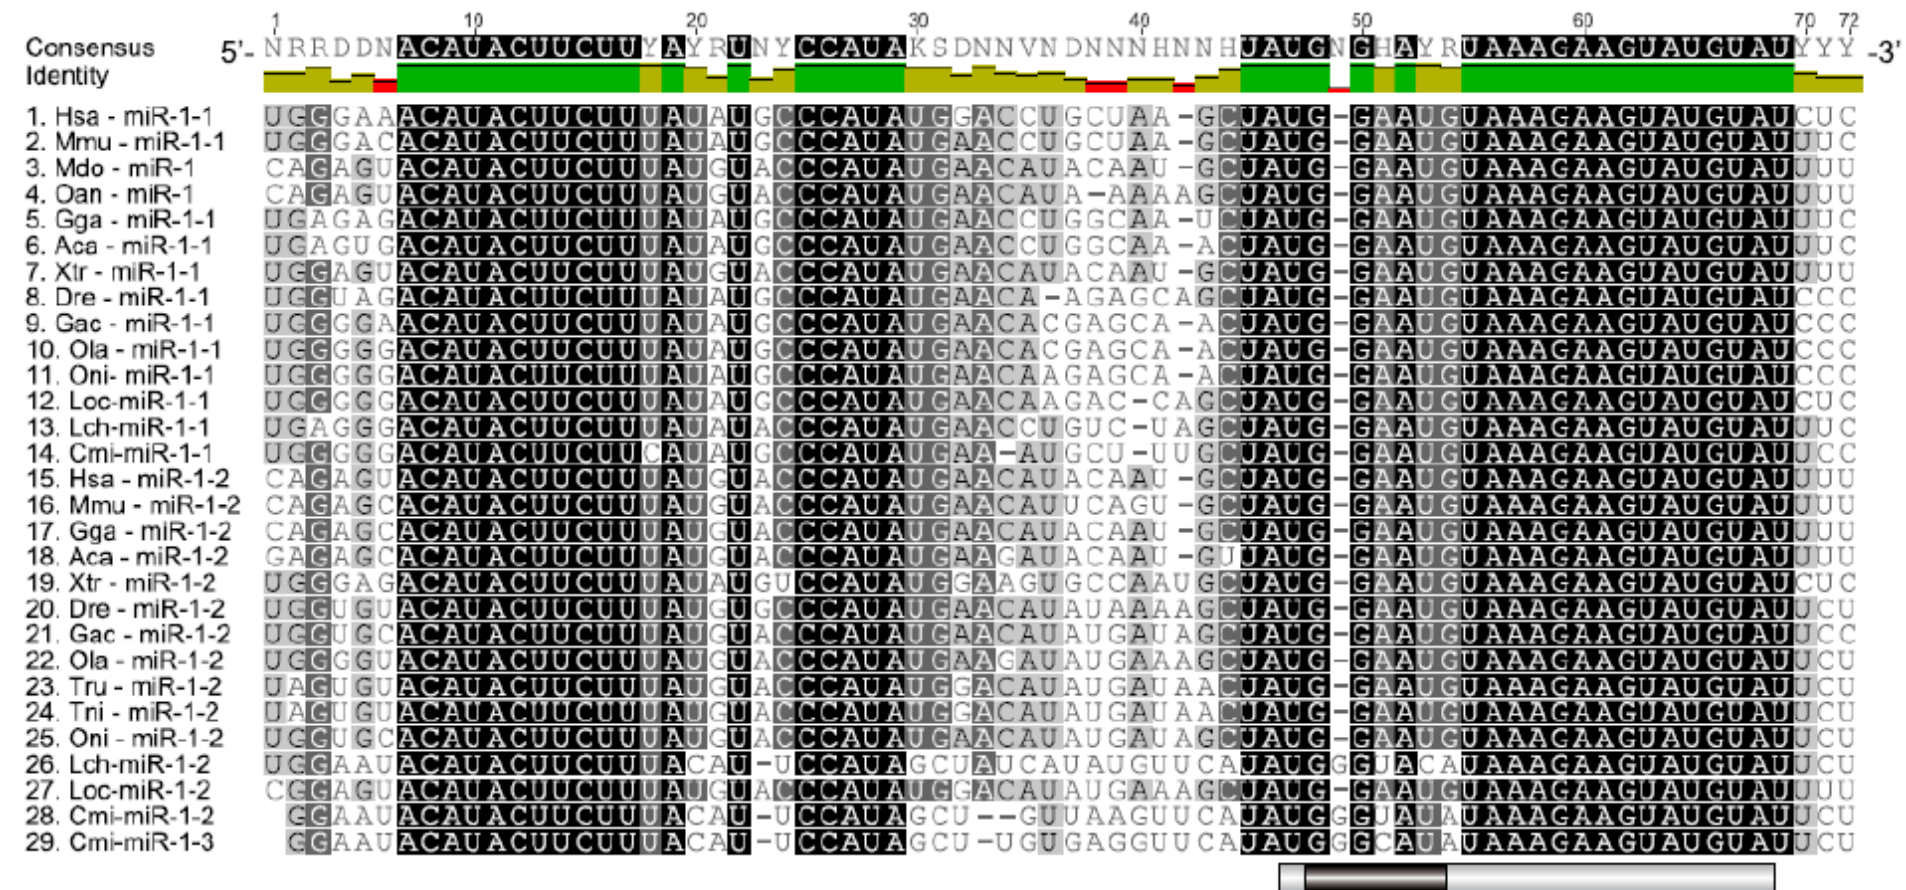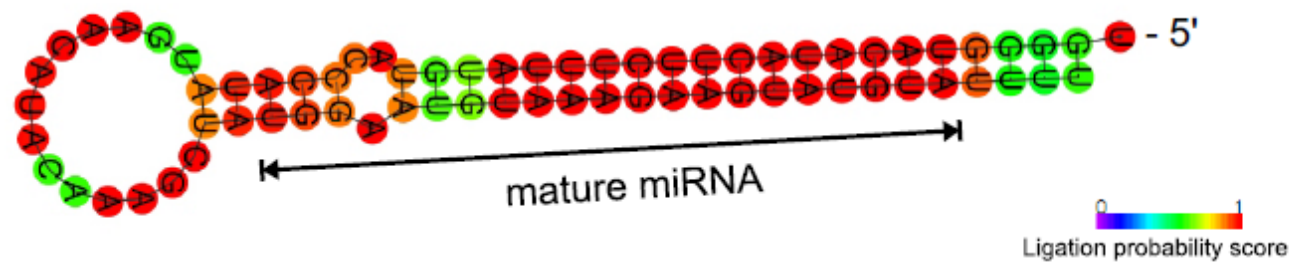

# Alignment of miR-133a

|                      | 1                                                                          | 10   | 20 | 30      | 40    | 50  | 60    | 70   | 73    |      |     |   |         |    |      |   |        |     |     |     |
|----------------------|----------------------------------------------------------------------------|------|----|---------|-------|-----|-------|------|-------|------|-----|---|---------|----|------|---|--------|-----|-----|-----|
| Consensus            | 5'-NNNN                                                                    | USCU | RV | AGCUGGU | HRAAA | KRG | RACCA | RAUC | NVYUN | HHNN | VBK | G | AUUUGGU | CC | MUUY | W | ACCAGY | UKY | AGS | -3' |
| Identity             | [Color-coded bar showing identity levels for each position]                |      |    |         |       |     |       |      |       |      |     |   |         |    |      |   |        |     |     |     |
| 1. Hsa - miR-133a-1  | GCUUUGCUAGAGCUGGUAAAAUGGAACCAAAUCCUUCUUCAAUUGGAUUUGGUCCCCUUCACCAGCUGUAGC   |      |    |         |       |     |       |      |       |      |     |   |         |    |      |   |        |     |     |     |
| 2. Mmu - miR-133a-1  | UGCUAAAGCUGGUAAAAUGGAACCAAAUCCUUCUUCAAUUGGAUUUGGUCCCCUUCACCAGCUGUAGC       |      |    |         |       |     |       |      |       |      |     |   |         |    |      |   |        |     |     |     |
| 3. Mdo - miR-133a    | GCUUUGCUAAAGCUGGUAAAAUGGAACCAAAUCCUUCUUCAAUUGGAUUUGGUCCCCUUCACCAGCUGUAGC   |      |    |         |       |     |       |      |       |      |     |   |         |    |      |   |        |     |     |     |
| 4. Oan - miR-133a    | GCUUUGCUAAAGCUGGUAAAAUGGAACCAAAUCCUUCUUCAAUUGGAUUUGGUCCCCUUCACCAGCUGUAGC   |      |    |         |       |     |       |      |       |      |     |   |         |    |      |   |        |     |     |     |
| 5. Gga - miR-133a-1  | GCUUUGCUAAAGCUGGUAAAAUGGAACCAAAUCCUUCUUCAAUUGGAUUUGGUCCCCUUCACCAGCUGUAGC   |      |    |         |       |     |       |      |       |      |     |   |         |    |      |   |        |     |     |     |
| 6. Aca - miR-133a-1  | GCUUUGCUAAAGCUGGUAAAAUGGAACCAAAUCCUUCUUCAAUUGGAUUUGGUCCCCUUCACCAGCUGUAGC   |      |    |         |       |     |       |      |       |      |     |   |         |    |      |   |        |     |     |     |
| 7. Xtr - miR-133a-1  | GCAAUUCUACAGCUGGUUGAAGGGGACCAAAUCCAUUGAAGAGGU GAUUUGGUUCCAUUJUACCAGCUJUAGC |      |    |         |       |     |       |      |       |      |     |   |         |    |      |   |        |     |     |     |
| 8. Dre - miR-133a-1  | GCUUUGCUAAAGCUGGUAAAAUGGAACCAAAUCCUUCUUCAAUUGGAUUUGGUCCCCUUCACCAGCUGUAGC   |      |    |         |       |     |       |      |       |      |     |   |         |    |      |   |        |     |     |     |
| 9. Gac - miR-133a-1  | GCUUUGCUAAAGCUGGUAAAAUGGAACCAAAUCCUUCUUCAAUUGGAUUUGGUCCCCUUCACCAGCUGUAGC   |      |    |         |       |     |       |      |       |      |     |   |         |    |      |   |        |     |     |     |
| 10. Ola - miR-133a-1 | GCUUUGCUAAAGCUGGUAAAAUGGAACCAAAUCCUUCUUCAAUUGGAUUUGGUCCCCUUCACCAGCUGUAGC   |      |    |         |       |     |       |      |       |      |     |   |         |    |      |   |        |     |     |     |
| 11. Tru - miR-133a-1 | GCUUUGCUAAAGCUGGUAAAAUGGAACCAAAUCCUUCUUCAAUUGGAUUUGGUCCCCUUCACCAGCUGUAGC   |      |    |         |       |     |       |      |       |      |     |   |         |    |      |   |        |     |     |     |
| 12. Tni - miR-133a-1 | GCUUUGCUAAAGCUGGUAAAAUGGAACCAAAUCCUUCUUCAAUUGGAUUUGGUCCCCUUCACCAGCUGUAGC   |      |    |         |       |     |       |      |       |      |     |   |         |    |      |   |        |     |     |     |
| 13. Oni - miR-133a-1 | GCUUUGCUAAAGCUGGUAAAAUGGAACCAAAUCCUUCUUCAAUUGGAUUUGGUCCCCUUCACCAGCUGUAGC   |      |    |         |       |     |       |      |       |      |     |   |         |    |      |   |        |     |     |     |
| 14. Loc-miR-133a-1   | GCUUUGCUAAAGCUGGUAAAAUGGAACCAAAUCCUUCUUCAAUUGGAUUUGGUCCCCUUCACCAGCUGUAGC   |      |    |         |       |     |       |      |       |      |     |   |         |    |      |   |        |     |     |     |
| 15. Lch-miR-133a-1   | GCUUUGCUAAAGCUGGUAAAAUGGAACCAAAUCCUUCUUCAAUUGGAUUUGGUCCCCUUCACCAGCUGUAGC   |      |    |         |       |     |       |      |       |      |     |   |         |    |      |   |        |     |     |     |
| 16. Cmi-miR-133a-1   | UCCUACAGCUGGUUGAAGGGGACCAAAUCCAUUGAAGAGUUGAUUUGGUUCCAUUJUACCAGCUJUAGC      |      |    |         |       |     |       |      |       |      |     |   |         |    |      |   |        |     |     |     |
| 17. Hsa - miR-133a-2 | GCUUUGCUAGAGCUGGUAAAAUGGAACCAAAUCCUUCUUCAAUUGGAUUUGGUCCCCUUCACCAGCUGUAGC   |      |    |         |       |     |       |      |       |      |     |   |         |    |      |   |        |     |     |     |
| 18. Mmu - miR-133a-2 | GCUUUGCUAAAGCUGGUAAAAUGGAACCAAAUCCUUCUUCAAUUGGAUUUGGUCCCCUUCACCAGCUGUAGC   |      |    |         |       |     |       |      |       |      |     |   |         |    |      |   |        |     |     |     |
| 19. Gga - miR-133a-2 | GCUUUGCUAAAGCUGGUAAAAUGGAACCAAAUCCUUCUUCAAUUGGAUUUGGUCCCCUUCACCAGCUGUAGC   |      |    |         |       |     |       |      |       |      |     |   |         |    |      |   |        |     |     |     |
| 20. Aca - miR-133a-2 | GCUUUGCUAAAGCUGGUAAAAUGGAACCAAAUCCUUCUUCAAUUGGAUUUGGUCCCCUUCACCAGCUGUAGC   |      |    |         |       |     |       |      |       |      |     |   |         |    |      |   |        |     |     |     |
| 21. Xtr - miR-133a-2 | GCUUUGCUAAAGCUGGUAAAAUGGAACCAAAUCCUUCUUCAAUUGGAUUUGGUCCCCUUCACCAGCUGUAGC   |      |    |         |       |     |       |      |       |      |     |   |         |    |      |   |        |     |     |     |
| 22. Dre - miR-133a-2 | GCUUUGCUAAAGCUGGUAAAAUGGAACCAAAUCCUUCUUCAAUUGGAUUUGGUCCCCUUCACCAGCUGUAGC   |      |    |         |       |     |       |      |       |      |     |   |         |    |      |   |        |     |     |     |
| 23. Gac - miR-133a-2 | GCUUUGCUAAAGCUGGUAAAAUGGAACCAAAUCCUUCUUCAAUUGGAUUUGGUCCCCUUCACCAGCUGUAGC   |      |    |         |       |     |       |      |       |      |     |   |         |    |      |   |        |     |     |     |
| 24. Ola - miR-133a-2 | GCUUUGCUAAAGCUGGUAAAAUGGAACCAAAUCCUUCUUCAAUUGGAUUUGGUCCCCUUCACCAGCUGUAGC   |      |    |         |       |     |       |      |       |      |     |   |         |    |      |   |        |     |     |     |
| 25. Oni - miR-133a-2 | GCUUUGCUAAAGCUGGUAAAAUGGAACCAAAUCCUUCUUCAAUUGGAUUUGGUCCCCUUCACCAGCUGUAGC   |      |    |         |       |     |       |      |       |      |     |   |         |    |      |   |        |     |     |     |
| 26. Loc-miR-133a-2   | GCUUUGCUAAAGCUGGUAAAAUGGAACCAAAUCCUUCUUCAAUUGGAUUUGGUCCCCUUCACCAGCUGUAGC   |      |    |         |       |     |       |      |       |      |     |   |         |    |      |   |        |     |     |     |
| 27. Lch-miR-133a-2   | GCUUUGCUAAAGCUGGUAAAAUGGAACCAAAUCCUUCUUCAAUUGGAUUUGGUCCCCUUCACCAGCUGUAGC   |      |    |         |       |     |       |      |       |      |     |   |         |    |      |   |        |     |     |     |
| 28. Cmi-miR-133a-2   | UGCUAAAGCUGGUAAAAAGAGAACCAAGAUUGAUUGUUCACACGGAUUUGGUCCCCUUCACCAGCUGUAGC    |      |    |         |       |     |       |      |       |      |     |   |         |    |      |   |        |     |     |     |
| 29. Cmi-miR-133a-3   | UGCUAAAGCUGGUAAAAUGGAACCAAAUCCUUCUUCAAUUGGAUUUGGUCCCCUUCACCAGCUGUAGC       |      |    |         |       |     |       |      |       |      |     |   |         |    |      |   |        |     |     |     |

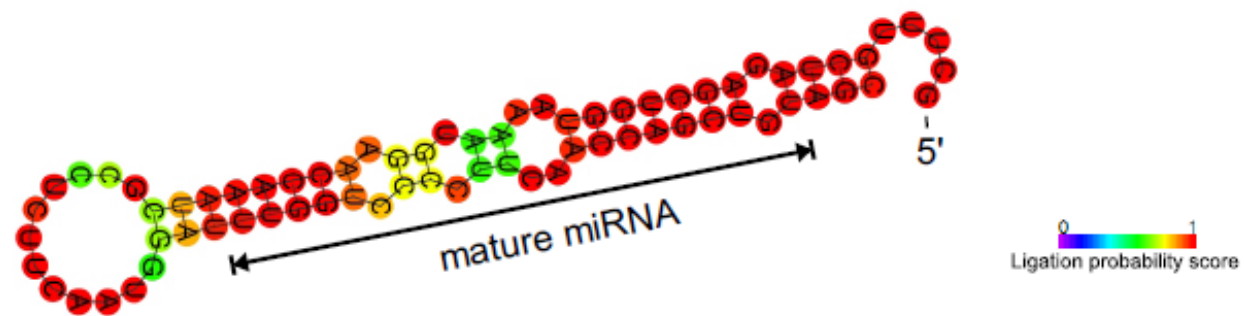

## Alignment of miR-133b

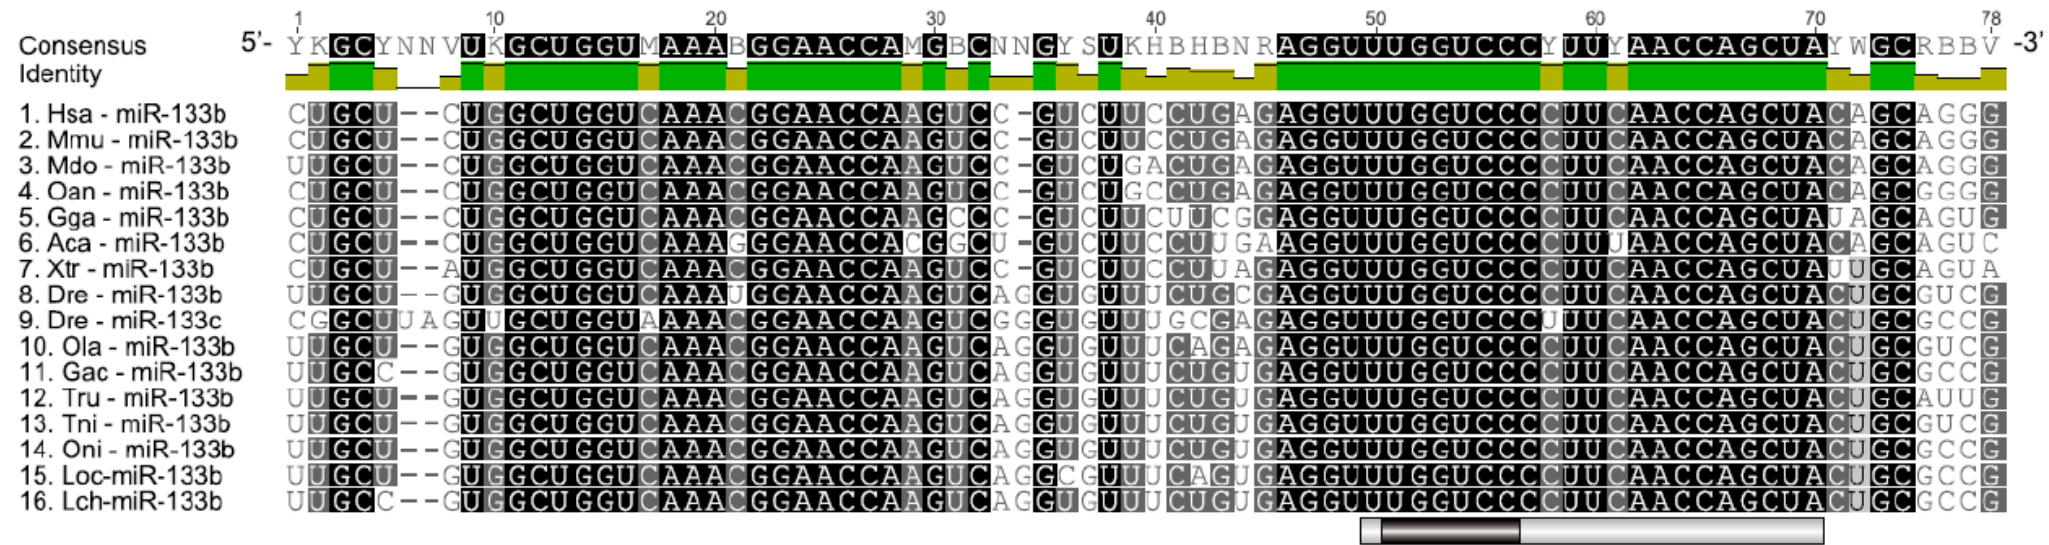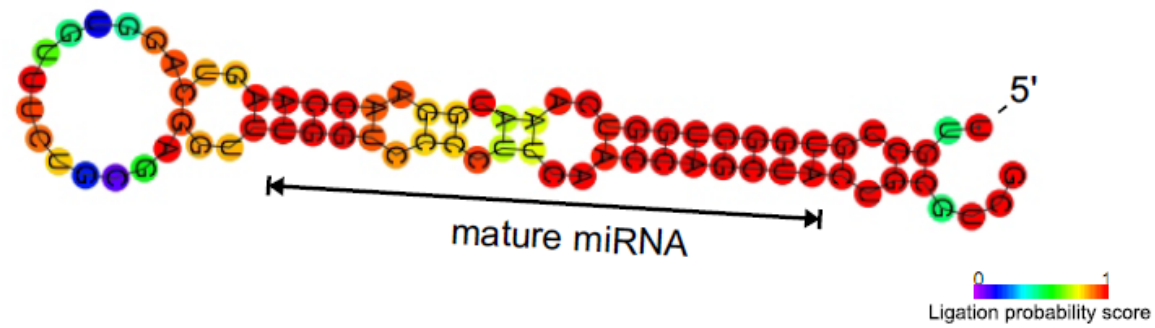

## Alignment of miR-206

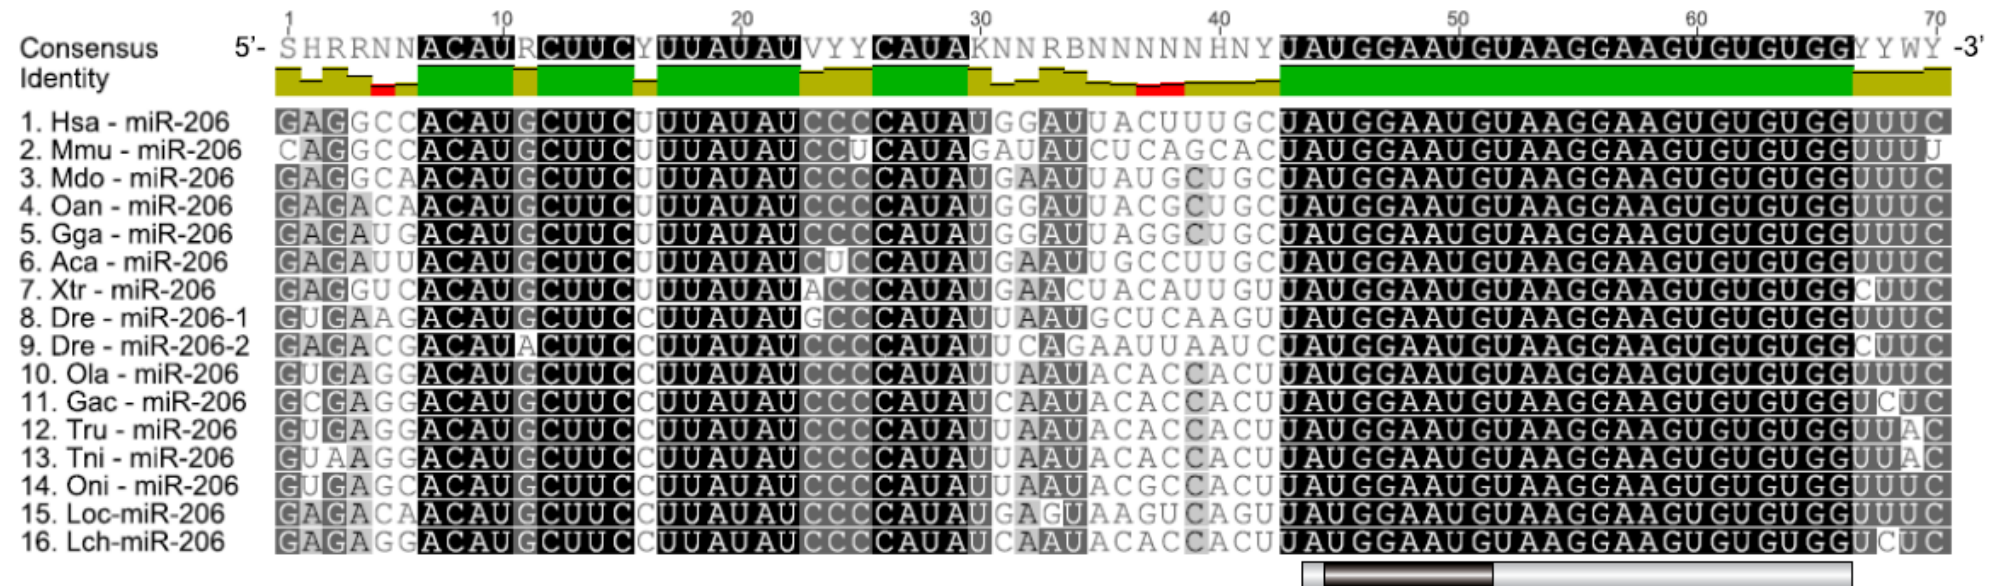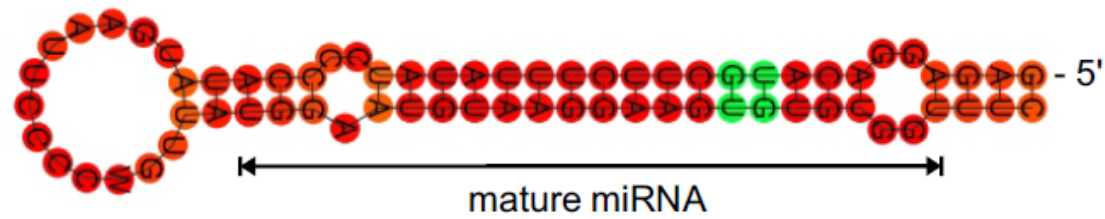

0 1  
Ligation probability score

# Alignment of miR-214

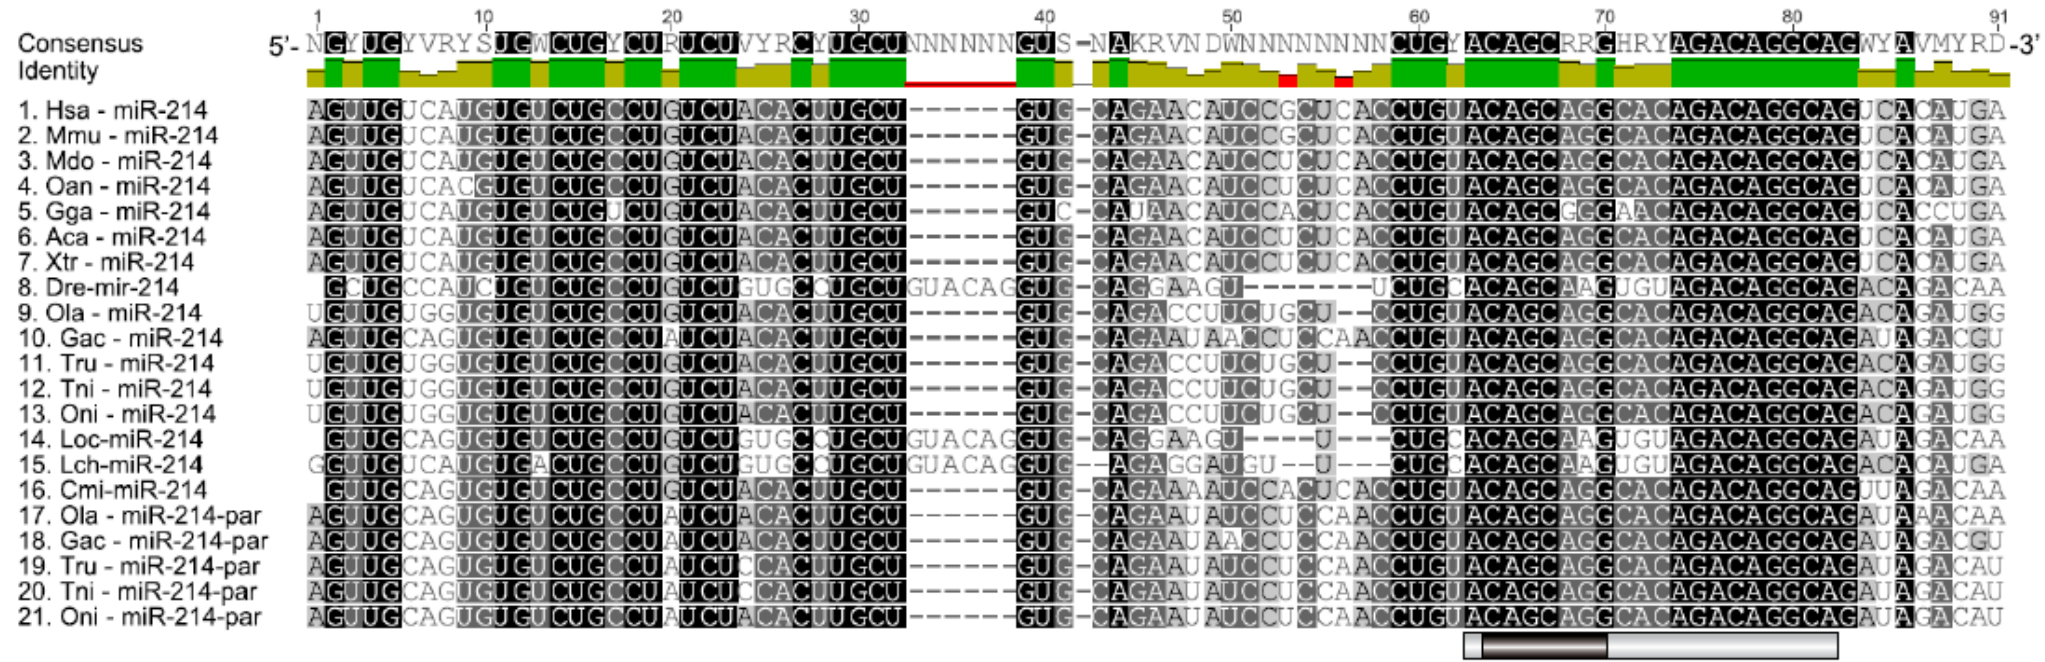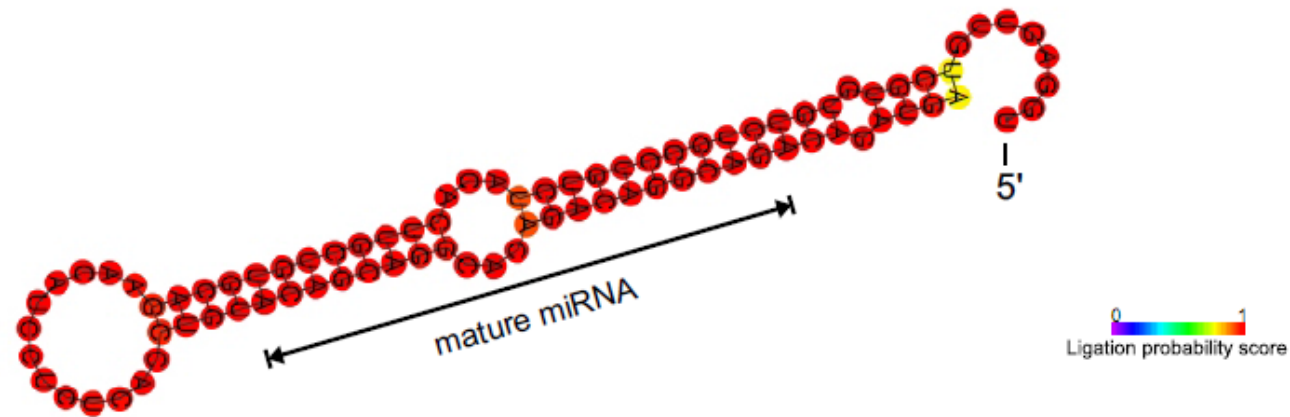

## Alignment of miR-499

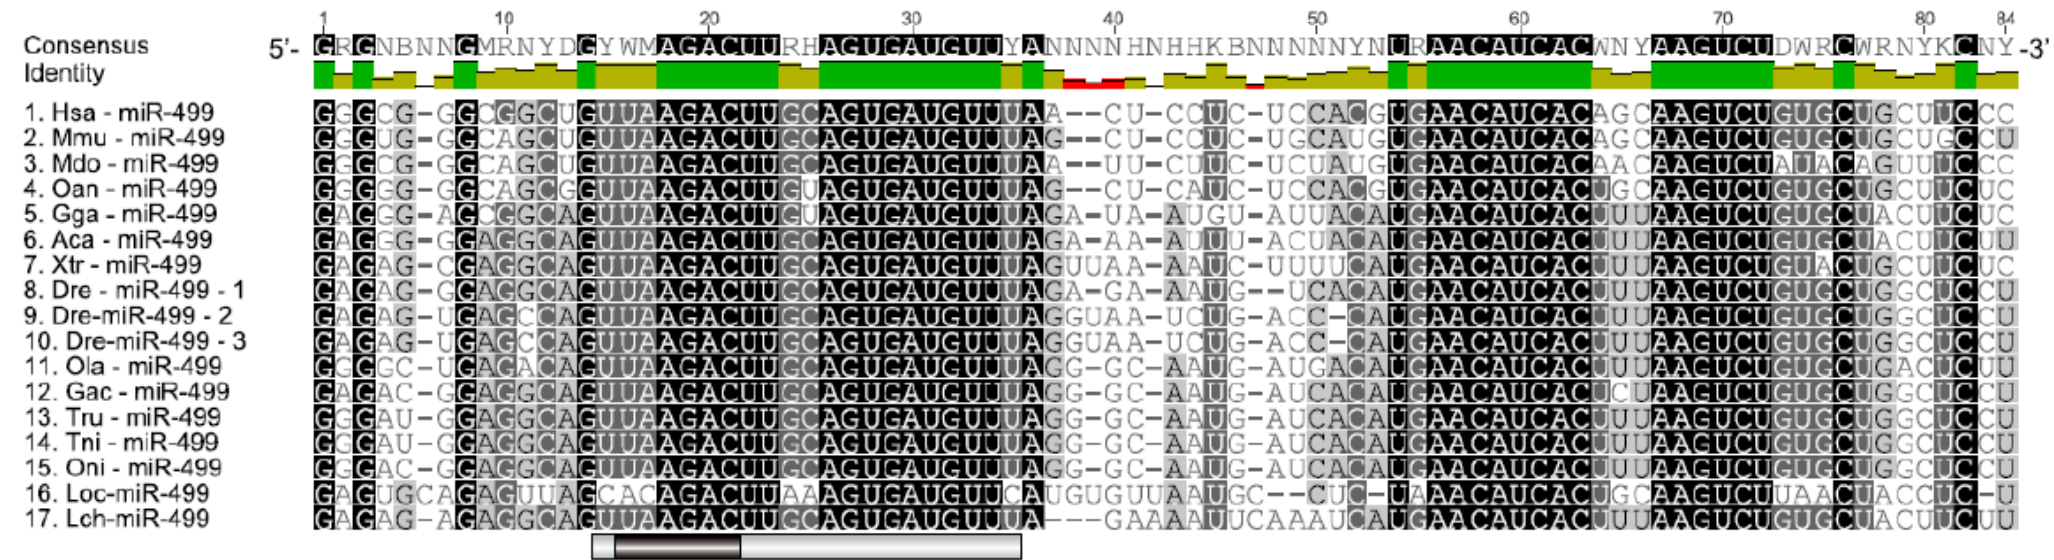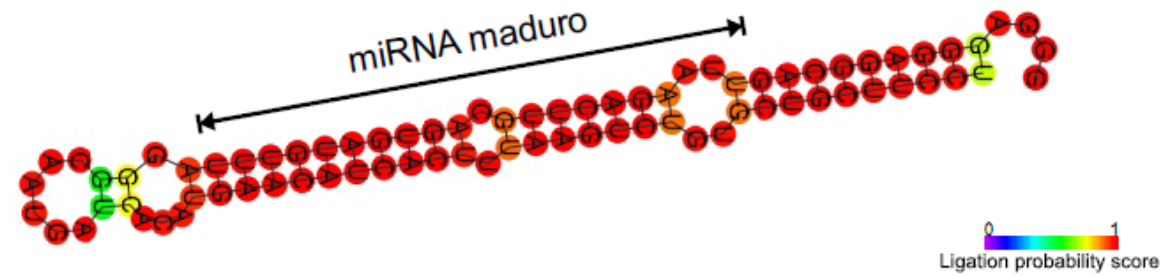

Supplement: 12862_2014_196_MOESM1_ESM.pdf [file 12862_2014_196_MOESM1_ESM.pdf]
