# Supplementary material for: Evolution and genomic organization of muscle microRNAs in fish genomes
Source: PubMed Central journal article supplement (PMC4177693; doi:10.1186/s12862-014-0196-x), 2014-09-25
Supplement: 12862_2014_196_MOESM2_ESM.pdf [file 12862_2014_196_MOESM2_ESM.pdf]

EVOLUTION AND GENOMIC ORGANIZATION OF MUSCLE MICRORNAS IN FISH GENOMES

Additional file 2:

Table S1. Novel and formerly published data on muscle miRNAs in vertebrate genomes.

| microRNAs   | Fishes          |                |                   |                 |                |                    |                   |                  |                      | Amphibians | Reptiles     | Birds          | Mammals               |               |                |                |
|-------------|-----------------|----------------|-------------------|-----------------|----------------|--------------------|-------------------|------------------|----------------------|------------|--------------|----------------|-----------------------|---------------|----------------|----------------|
|             | Osteichthyes    |                |                   |                 |                |                    |                   |                  | Chondrichthyes       |            |              |                | Monotremata           | Marsupials    | Eutherians     |                |
|             | Zebrafish (Dre) | Medaka (Ola)   | Stickleback (Gac) | Tetraodon (Tni) | Fugu (Tru)     | Nile tilapia (Oni) | Spotted gar (Loc) | Coelacanth (Lch) | Elephant shark (Cmi) | Frog (Xtr) | Lizard (Aca) | Finch (Tgu)    | Ornithorhynchus (Oan) | Opossum (Mdo) | Mouse (Mmu)    | Human (Hsa)    |
| miR-1-1     | ○ <sup>#</sup>  | ○ <sup>#</sup> | ○*                | †*              | †*             | ○*                 | ○*                | ○*               | ○ <sup>#</sup>       | ○*         | ○*           | ○*             | ○*                    | ○*            | ○ <sup>#</sup> | ○ <sup>#</sup> |
| miR-1-2     | ○ <sup>#</sup>  | ○ <sup>#</sup> | ○*                | ○*              | ○*             | ○*                 | ○*                | ○*               | ○ <sup>#</sup>       | ○*         | ○*           | ○*             | ○*                    | ○*            | ○ <sup>#</sup> | ○ <sup>#</sup> |
| miR-133a-1  | ○ <sup>#</sup>  | ○ <sup>#</sup> | ○*                | ○*              | ○*             | ○*                 | ○*                | ○*               | ○ <sup>#</sup>       | ○*         | ○*           | ○*             | ○*                    | ○*            | ○ <sup>#</sup> | ○ <sup>#</sup> |
| miR-133a-2  | ○ <sup>#</sup>  | ○ <sup>#</sup> | ○*                | †*              | †*             | ○*                 | ○*                | ○*               | ○ <sup>#</sup>       | ○*         | ○*           | ○*             | ○*                    | ○*            | ○ <sup>#</sup> | ○ <sup>#</sup> |
| miR-133b    | ○ <sup>#</sup>  | ○ <sup>#</sup> | ○*                | ○*              | ○*             | ○*                 | ○*                | ○*               | †*                   | ○*         | ○*           | ○*             | ○*                    | ○*            | ○ <sup>#</sup> | ○ <sup>#</sup> |
| miR-206     | ○ <sup>#</sup>  | ○ <sup>#</sup> | ○*                | ○*              | ○*             | ○*                 | ○*                | ○*               | †*                   | ○*         | ○*           | ○*             | ○*                    | ○*            | ○ <sup>#</sup> | ○ <sup>#</sup> |
| miR-208a    | †*              | †              | †*                | †*              | †*             | †*                 | †*                | ○*               | †*                   | ○*         | ○*           | ○*             | ○*                    | ○*            | ○ <sup>#</sup> | ○ <sup>#</sup> |
| miR-208b    | †*              | †              | †*                | †*              | †*             | †*                 | †*                | †*               | †*                   | †*         | †*           | †*             | ○*                    | ○*            | ○ <sup>#</sup> | ○ <sup>#</sup> |
| miR-214     | ○ <sup>#</sup>  | ○*             | ○*                | ○*              | ○*             | ○*                 | ○*                | ○*               | ○*                   | ○*         | ○*           | ○*             | ○*                    | ○*            | ○*             | ○*             |
| miR-214-par | †*              | ○*             | ○*                | ○*              | ○*             | ○*                 | †*                | †*               | †*                   | †*         | †*           | †*             | †*                    | †*            | †*             | †*             |
| miR-499     | ○ <sup>#</sup>  | ○ <sup>#</sup> | ○ <sup>#</sup>    | ○ <sup>#</sup>  | ○ <sup>#</sup> | ○ <sup>#</sup>     | ○*                | ○*               | †*                   | ○*         | ○*           | ○ <sup>#</sup> | ○*                    | ○*            | ○ <sup>#</sup> | ○ <sup>#</sup> |

Note - † - miRNA undetected in the genome; ○ - Intergenic miRNA; ○ - Intronic miRNA; \* - data acquired in the present study; # - data previously published (Flynt et al., 2007; van Rooij et al., 2008; Bhuiyan et al., 2013; Tani et al., 2013); Dre – *Danio rerio*; Ola – *Oryzias latipes*; Gac - *Gasterosteus aculeatus*; Tni – *Tetraodon nigroviridis*; Tru – *Takifugu rubripes*; Oni – *Oreochromis niloticus*; Loc - *Lepisosteus oculatus*; Lch - *Latimeria chalumnae*; Cmi - *Callorhynchus milii*; Xtr – *Xenopus tropicalis*; Aca – *Anolis carolinensis*; Tgu – *Taeniopygia guttata*; Oan – *Ornithorhynchus anatinus*; Mdo – *Monodelphis domestica*; Mmu – *Mus musculus*; Hsa – *Homo sapiens*.
