# Supplementary material for: Evolution and genomic organization of muscle microRNAs in fish genomes
Source: PubMed Central journal article supplement (PMC4177693; doi:10.1186/s12862-014-0196-x), 2014-09-25
Supplement: 12862_2014_196_MOESM3_ESM.pdf [file 12862_2014_196_MOESM3_ESM.pdf]

## EVOLUTION AND GENOMIC ORGANIZATION OF MUSCLE MICRORNAS IN FISH GENOMES

### Additional file 3:

**Table S1.** Structural characteristics of muscle miRNAs in fish genomes.

| miRNA                  | Zebrafish |        | Medaka   |        | Stickleback |        | Tetraodon |        | Fugu     |        | Nile tilapia |        | Spotted gar |        | Coelacanth |        | Elephant shark |        |
|------------------------|-----------|--------|----------|--------|-------------|--------|-----------|--------|----------|--------|--------------|--------|-------------|--------|------------|--------|----------------|--------|
|                        | Distance  | Intron | Distance | Intron | Distance    | Intron | Distance  | Intron | Distance | Intron | Distance     | Intron | Distance    | Intron | Distance   | Intron | Distance       | Intron |
| <b>miR-1-1/-133a-2</b> | 37.8kb    | -      | 22.2kb   | -      | 8.8kb       | -      | -         | -      | -        | -      | 17kb         | -      | 12.2kb      | -      | 40kb       | -      | 9.3kb          | -      |
| <b>miR-1-2/-133a-1</b> | 2.1kb     | 12     | 2.7kb    | 12     | 3.1kb       | 12     | 2.5kb     | 12     | 2.5kb    | 12     | 3.4kb        | 12     | 3kb         | 11     | 3kb        | 12     | 4.6kb          | 11     |
| <b>miR-206/-133b</b>   | 1.2kb     | -      | 0.6kb    | -      | 0.6kb       | -      | 0.6kb     | -      | 0.6kb    | -      | 0.8kb        | -      | 2kb         | -      | 0.6kb      | -      | -              | -      |
| <b>miR-214</b>         | -         | 10     | -        | 15     | -           | 15     | -         | 13     | -        | 13     | -            | 14     | -           | 14     | -          | 13     | -              | 13     |
| <b>miR-214-par</b>     | -         | -      | -        | 15     | -           | 15     | -         | 14     | -        | 14     | -            | 15     | -           | -      | -          | -      | -              | -      |
| <b>miR-499</b>         | -         | 18     | -        | -      | -           | -      | -         | 19     | -        | 19     | -            | 17     | -           | 18     | -          | 18     | -              | -      |

Note - "Distance" is related to the approximately number of bases (kb) between miRNAs on the same cluster; "-" means unneeded information
